# Supplementary material
Source: PubMed Central journal article supplement (PMC6583080)
Supplement: jamaotolaryngolheadnecksurg-144-1126-s001.pdf [file jamaotolaryngolheadnecksurg-144-1126-s001.pdf]

## **PROTOCOL:**

### **Internet-based intervention versus face-to-face clinical care for tinnitus: A randomized control trial**

**Title:** internet-based intervention versus face-to-face clinical care for tinnitus: A randomized control trial

**Clinical Trials registration number:** NCT02665975

**Principle Investigator:** Eldré Beukes

[Eldre.beukes@anglia.ac.uk](mailto:Eldre.beukes@anglia.ac.uk)

**Ethical approval:** Cambridge South Research Ethics Committee, under the REC reference number: 16/EE/0148. The IRAS project identification number is 195565

**Sponsor:** Anglia Ruskin University

**Clinical Sites:** Norfolk and Norwich University Hospitals NHS Foundation Trust

Hinchingbrooke Health Care HNS Trust

Milton Keynes University Hospital NHS Foundation Trust

**Intervention:** Internet-based cognitive behavioural therapy intervention for tinnitus (iCBT)

## **INTRODUCTION**

Experiencing tinnitus may be very distressing, due to hearing unwanted subjective auditory sensations, such as ringing or buzzing. Many aspects of daily life, such as sleep, mood and concentration may be affected as a result of having tinnitus. Ensuring readily accessible specialist tinnitus clinical services throughout the country is desirable, but difficult to implement, due to the burdens on the current health care system. Innovative ways of helping those with tinnitus, as well as manage the related health care burden, is required. An alternative tinnitus management approach was therefore developed in the form of an internet-delivered cognitive behavioural intervention (iCBT), based on previous research in Europe that showed promising results. A protocol to assess the effectiveness of an internet-based intervention in the UK was published and initial clinical trials are underway. To ensure the gold standard for testing a new intervention is followed, it needs to be compared to standard clinical care. The aim of this research is, therefore, to evaluate the effectiveness of internet-delivered treatment for tinnitus, to that of face-to-face clinical care provided in Tinnitus Clinics. This study is important as it is actively looking at improving patient experiences by developing additional accessible services and excellence in care for adults with tinnitus.

The internet-based intervention is based on cognitive behavioural therapy principles and will be referred to as iCBT in this protocol.

## **OBJECTIVES**

1. To compare the effectiveness of iCBT to that of standard face-to-face clinical care, in reducing the impact of tinnitus, for adults in the East of England
2. To ascertain predictors of outcome for whom this iCBT intervention is a suitable intervention

3. To determine the longer-term effects of both interventions, 2 months post-intervention

## **STUDY DESIGN**

This study is designed to let the public, clinician's and researchers work together in creating an opportunity for a new scientific and clinical intervention. Involvement from a service public-patient partnership is included in this study. A multicentre intervention study is proposed at three sites in the East of England (EOE), namely Norfolk and Norwich Universities Hospitals Trust, Milton Keynes University Hospital NHS Foundation Trust and Hinchingsbrooke Health Care NHS Trust, which all have reputable clinical tinnitus services.

The study is a non-inferiority two-armed randomized control trial (RCT), with a two-month follow-up, to evaluate the longer term effectiveness of iCBT on tinnitus distress. The experimental group will receive eight weeks of guided internet-delivered treatment (iCBT). The control group will receive a standard tinnitus audiological appointment and follow-ups. A randomised trial design, regarding centres as blocks will be used.

## **PARTICIPANTS**

### **Sample size**

Sample size calculations have indicated that 46 participants are required per group.

Estimated recruitment is 36 participants from both Norfolk and Norwich University Hospital and Hinchingsbrookes Hospital and 20 from Milton Keynes University Hospital.

## **ENROLLMENT**

All adult patients referred to the Tinnitus Clinic by ENT consultants and Audiologists at the clinical sites during the recruitment period who meet inclusion criteria will be invited to participate. The invitation will be made according to standard appointment approaches for each site, by giving the PIS at this stage.

Those interested can find out more about the study from the PI or public-patient partnership and register for the study on the study website ([www.tacklingtinnitus.co.uk](http://www.tacklingtinnitus.co.uk)).

It is estimated that recruitment will last over a 5 month period.

## **Inclusion Criteria**

1. Referred by an ENT Consultant or Audiologist for tinnitus intervention
2. The ability to read and type in English
3. No barriers to using a computer (e.g. significant fine motor control or visual problems)
4. Internet and e-mail access, and the ability to use these
5. Commitment to completing the programme
6. Completion of the online screening and outcome questionnaires
7. Agreeing to participate in either group and be randomized to one of these groups
8. Understanding and working towards the end goal of reducing the impact and distress of tinnitus, although the strength of the tinnitus may remain the same
9. Availability for 2 months after starting the study to complete an online follow-up questionnaire

### Exclusion Criteria

1. Reporting any major medical or psychiatric conditions
2. Undergoing any tinnitus therapy concurrently to partaking in this study

### Withdrawal

Participants will be informed of the right to withdraw without penalty. Statistical analysis will be done on an intention to treat basis unless they request all data removal.

### SCHEDULE

The study timescales will be finalized following ethical approvals. Recruitment will be aimed to start in August, with initial participants from the face-to-face interventions to be seen between September 2016-February 2017 for their initial and follow-up appointments. Study close out will be two months after their intervention, which is estimated to be by April 2017. A broad outline of procedures and the schedule is indicated in Tables 1 and 2 respectively.

**Table 1: Procedures required during the study**

| PROCEDURE                                   | DESCRIPTION                                                                                        | CONDUCTED BY                                    | TIME                                               | HOW THIS COMPARES WITH CURRENT PROTOCOLS           |
|---------------------------------------------|----------------------------------------------------------------------------------------------------|-------------------------------------------------|----------------------------------------------------|----------------------------------------------------|
| <b>Information provided about the study</b> | PIS sent together with standard hospital letter inviting patients to make appointments or given at | Letter given by PI to distribute after referral | 5 minutes to do<br>20 minutes for patients to read | Letter sent as standard. PIS included additionally |

|                                                                    |                                                                                                                                                                                            |                             |            |                                           |
|--------------------------------------------------------------------|--------------------------------------------------------------------------------------------------------------------------------------------------------------------------------------------|-----------------------------|------------|-------------------------------------------|
|                                                                    | hospital at time of referral                                                                                                                                                               |                             |            |                                           |
| <b>Deciding whether to participate</b>                             | Patients wanting more information will be directed to the study website and the PI will answer further enquiries. Independent advice is available from members of the patient/public forum | PI and patient/public forum | 15 minutes | Additional                                |
| <b>Registering for the study</b>                                   | Register interest on the study website                                                                                                                                                     | PI                          | 2 minutes  | Additional                                |
| <b>Online consent to partake in the research</b>                   | Read the information and consent by sending back the form                                                                                                                                  | PI                          | 5 minutes  | Additional                                |
| <b>Online screening Questionnaire</b>                              | Complete and online demographical questionnaire and outcome measures                                                                                                                       | PI                          | 30 minutes | Normally done at clinics, now done online |
| <b>A telephone call for those completing the online screening.</b> | At a time that the patient has chosen as convenient, the PI will                                                                                                                           | PI                          | 10 minutes | Additional                                |

|                                                               |                                                                                                                                                                                       |                                                                                                  |                                                                         |                   |
|---------------------------------------------------------------|---------------------------------------------------------------------------------------------------------------------------------------------------------------------------------------|--------------------------------------------------------------------------------------------------|-------------------------------------------------------------------------|-------------------|
|                                                               | telephone them. This will act as an additional filter to ensure criteria is met and to provide the opportunity for the research to be explained and additional questions to be asked. |                                                                                                  |                                                                         |                   |
| <b>Randomisation</b>                                          | Randomization into the experimental or control group, using the centre as blocks. Email notification of group and instructions                                                        | PI. Notify clinic administrator of those participating and those requiring clinical appointments | 5 minutes to read the e-mail                                            | Additional        |
| <b>Experimental group: internet-based intervention (iCBT)</b> | This group will have access to 21 Modules related to tinnitus management                                                                                                              | PI                                                                                               | 8 weeks                                                                 | Additional        |
| <b>Control group: face-to-face clinical intervention</b>      | Provision of standard tinnitus management provided                                                                                                                                    | CLINICAL SITES:<br>AUDIOLOGISTS                                                                  | 30 min- 1-hour appointments as required, generally 2-3 appointments are | Standard practice |

|                                                       |                                                                                                                                            |                                         |                                                   |                                           |
|-------------------------------------------------------|--------------------------------------------------------------------------------------------------------------------------------------------|-----------------------------------------|---------------------------------------------------|-------------------------------------------|
|                                                       |                                                                                                                                            |                                         | required, but will be tailored to each individual |                                           |
| <b>Post-intervention outcome measures</b>             | Completing the same outcome measures as prior to starting the intervention to compare outcomes                                             | PI                                      | 10-20 minutes                                     | Normally done at clinics, now done online |
| <b>Post-intervention phone call to</b>                | To discuss progress and provide the opportunity for participants to share experiences of the study and discuss if further help is required | PI                                      | 10 minutes                                        | Additional                                |
| <b>Longer term Post-intervention outcome measures</b> | Completing the same outcome measures as before to determine the longer term effects of the treatment                                       | PI/<br>collaborative research assistant | 10-20 minutes                                     | Additional                                |



**Table 2: Schedule of enrolment, interventions and assessment**

| <b>STUDY PERIOD</b>              |                       |                      |                                                   |                                                       |
|----------------------------------|-----------------------|----------------------|---------------------------------------------------|-------------------------------------------------------|
|                                  | <b>Enrolment</b>      | <b>Allocation</b>    | <b>Post-allocation</b>                            | <b>Close-out</b>                                      |
| <b>TIMEPOINT</b>                 | <i>-T<sub>1</sub></i> | <i>T<sub>0</sub></i> | <i>T<sub>1</sub> (following intervention end)</i> | <i>T<sub>x</sub> (2 months post intervention end)</i> |
| <b>ENROLMENT</b>                 |                       |                      |                                                   |                                                       |
| Informed consent                 | X                     |                      |                                                   |                                                       |
| Eligibility screen               | X                     |                      |                                                   |                                                       |
| Allocation                       |                       | X                    |                                                   |                                                       |
| <b>INTERVENTIONS</b>             |                       |                      |                                                   |                                                       |
| Experimental group               |                       | X                    |                                                   |                                                       |
| Control group                    |                       | X                    |                                                   |                                                       |
| <b>ASSESSMENTS</b>               |                       |                      |                                                   |                                                       |
| Tinnitus Functional Index        | X                     |                      | X                                                 | X                                                     |
| Tinnitus Handicap Inventory      | X                     |                      | X                                                 | X                                                     |
| Hearing Handicap Inventory       | X                     |                      | X                                                 | X                                                     |
| Insomnia Severity Index          | X                     |                      | X                                                 | X                                                     |
| Cognitive Failures Questionnaire | X                     |                      | X                                                 | X                                                     |
| Hyperacusis Questionnaire        | X                     |                      | X                                                 | X                                                     |
| Patient Health Questionnaire     | X                     |                      | X                                                 | X                                                     |
| Generalised Anxiety Disorder     | X                     |                      | X                                                 | X                                                     |
| Satisfaction with Life           | X                     |                      | X                                                 | X                                                     |

All participants will have access to face-to-face clinical care if required, as they will be registered with the local Audiology Departments and will have access to these services. They will also have continued use of the e-learning programme, despite the programme completing. In this way, they will continue to have access to materials enabling self-management.

## **EVALUATIONS**

The format of the questionnaire delivery will remain consistent throughout the study using online questionnaires.

Those consenting will undergo an online screening questionnaire, including demographical information, tinnitus related questions and outcome measures. The outcome measures to be used will include those related to tinnitus and other life areas which may be affected, therefore looking at hearing disability, hyperacusis, insomnia, concentration, satisfaction with life, anxiety and depression, as seen in Table 3.

The main outcome measure will be the Tinnitus Functional Index (Meikle MB, Henry JA, Griest SE, et al. The Tinnitus Functional Index: development of a new clinical measure for chronic, intrusive tinnitus. *Ear Hear* 2012; 33:153–76). Secondary outcome measures are shown in Table 2.

TABLE 3: OUTCOME MEASURES USED DURING THE STUDY

| Measure and validation reference             | Items | Scale used | Internal consistency (Cronbach's alpha) |
|----------------------------------------------|-------|------------|-----------------------------------------|
| <b>Tinnitus Functional Index</b>             | 25    | 1-10       | 0.97                                    |
| <b>Tinnitus Handicap Inventory</b>           | 20    | 1-3        | 0.87                                    |
| <b>Hearing Handicap Inventory: Screening</b> | 10    | 1-3        | 0.93                                    |
| <b>Insomnia Severity Index</b>               | 7     | 0-4        | 0.74                                    |
| <b>Cognitive Failures Questionnaire</b>      | 25    | 0-4        | 0.89                                    |
| <b>Hyperacusis Questionnaire</b>             | 14    | 0-4        | 0.66-0.68                               |
| <b>Patient Health Questionnaire</b>          | 9     | 0-3        | 0.83                                    |
| <b>Generalised Anxiety Disorder</b>          | 7     | 0-3        | 0.89                                    |
| <b>Satisfaction with Life Scales</b>         | 5     | 1-7        | 0.87                                    |

## INTERVENTIONS

Both groups will have access to the following within the hospitals Audiology departments and this will be seen essential hearing aid care and will not form part of the study:

- Any hearing aid required work will be done outside the remits of this study by the Audiology clinics
- Any additional tinnitus equipment required and given as standard will be provided by the Audiology Departments regardless of group allocation.

The interventions provided for this study are those based on counselling and not on equipment or amplification.

Experimental Group:

The intervention to be followed has been built on an internet-based CBT self-help programme (iCBT) developed by Gerhard Andersson in Sweden. It incorporates a combination of a cognitive rational, and a learning theory approach. The PI has designed this material in an interactive e-learning version. This will ensure the

intervention is visually stimulating, engaging and responsive to participant's progress.

The intervention is tailored, consisting of suggested modules and optional modules, covered over a period of eight weeks, as shown in Table 4. The modules contain a mixture of information, videos, quizzes, diagrams, suggested techniques to apply to daily life, worksheets to keep track of progress, solutions for common problems and downloadable information.

The iCBT intervention will be delivered on a secure web platform, for which participants will receive password protected login information.

**Table 4: The components of the iCBT intervention**

| Week | Module                        | Explanation                            | Application                                |
|------|-------------------------------|----------------------------------------|--------------------------------------------|
| 1    | About this treatment          | Introduction to the modules            | Reading                                    |
|      | Tinnitus overview             | In depth information                   | Quizzes                                    |
| 2    | Relaxation: step 1            | Deep relaxation                        | 10-15 min, twice/day                       |
|      | Identifying negative thoughts | The link between thoughts and feelings | Writing down thoughts                      |
|      | *Sound enrichment             | Using background sounds                | Applying external sounds                   |
| 3    | Relaxation: step 2            | Diaphragmatic breathing                | 5-7 min, twice/day                         |
|      | Cognitive restructuring       | Analysing thoughts                     | Writing down situation, thoughts, feelings |
|      | *Sleep guidelines             | Various Techniques                     | Choose and apply techniques                |
| 4    | Relaxation: step 3            | Entire body relaxation                 | 2-3 min, twice/day                         |

|   |                              |                                                      |                                                                      |
|---|------------------------------|------------------------------------------------------|----------------------------------------------------------------------|
|   | Positive imagery             | Use to enhance relaxation                            | Twice/day after relaxation                                           |
|   | *Concentration tips          | Techniques discussed                                 | Engage in mentally engaging activities                               |
| 5 | Relaxation: step 4           | Rapid relaxation                                     | 20-60 sec, 5-10 times/day                                            |
|   | Focus exercises              | Mindful awareness                                    | Twice/day after relaxation                                           |
|   | *Sensitivity to sound        | Gradual exposure                                     | Listen to non-damaging, non-annoying sounds                          |
| 6 | Relaxation: step 5           | Rapid relaxation in more difficult situations        | 30-60 sec, 10-15 times/day                                           |
|   | Reinterpretation of tinnitus | Change negative tinnitus associations                | Writing about tinnitus thoughts                                      |
|   | * Hearing tactics            | Communication advice                                 | Follow advice                                                        |
| 7 | Relaxation: step 6           | Making relaxation part of daily routines and habits  | Rapid relaxation 10-20 times/day                                     |
|   | Exposure to tinnitus         | Decrease negative emotions and avoidance of tinnitus | Actively listen to tinnitus for 5-10 min, once/day, after relaxation |
| 8 | Key points summary           | Highlighting key concepts                            | Online quiz                                                          |
|   | Future planning              | Maintenance and relapse prevention                   | Making a plan to use tools in daily life                             |

**Optional modules are marked with an \***

### Control group:

This group will receive standard face-to-face clinical care and local protocols will be followed. Care will be individualized and 1-3 appointments may be required, which may last between 30-60 minutes each. Table 5 shows what these appointments may include:

**Table 5: Control group (standard clinical care interventions)**

| Appo<br>intm<br>ent | Content                                   | Explanation                                               | Application                   |
|---------------------|-------------------------------------------|-----------------------------------------------------------|-------------------------------|
| 1                   | Providing explanations about hearing loss | Go through individual's hearing loss and implications     | Look at audiograms            |
|                     | Provide information about tinnitus        | Explain the tinnitus model                                | Counselling, use of diagrams  |
|                     | Develop and individual management plan    | Consider patient history and outcomes to discuss together | Clinician/ patient discussion |
|                     | Sound enrichment                          | Discussing the principles of using sound therapy          | Counselling/ leaflet          |
|                     | Sleep management                          | Provide guidelines to assist sleep management             | Counselling/ leaflet          |
|                     | Relaxation advice                         | Providing guidelines on the use of relaxation             | Counselling/ leaflets         |
|                     | Negative though management                | Managing unhelpful thought patterns                       | Counselling/ leaflets         |
|                     | Other                                     | Tailored to the individual                                |                               |

|   |                                                                                 |                                                                |                               |
|---|---------------------------------------------------------------------------------|----------------------------------------------------------------|-------------------------------|
| 2 | Discuss progress of the individual management plan                              | Review progress and in which areas attention is still required | Clinician/ patient discussion |
|   | Cover any areas above not covered in appointment 1 or still requiring attention | Consider progress and difficulties following appointment 1     | Counselling/ leaflet          |
| 3 | Discuss progress of the individual management plan                              | Review progress and in which areas attention is still required | Clinician/ patient discussion |
|   | Cover any areas above not covered in appointment 1 or still requiring attention | Consider progress and difficulties following appointment 2     | Counselling/ leaflet          |

Following each session, the clinician will complete a form ticking what was done in the appointment with a study code of the patient seen, using an online questionnaire link. This will be sent to the PI to record what intervention took place.

### **SAFETY AND CLINICAL MONITORING**

The online questionnaires will identify scores indicative of additional problems which are often co-existent with tinnitus such as anxiety and depression. If these scores are significantly high at any point, a letter will be passed onto the clinical site to send to the General Practitioner. The patient will also be informed.

All personal data will be kept confidentiality. Due to the nature of the guided treatment protocol the main researcher needs to have access to some personal data of the participants to help to contact them. This information will be kept strictly confidential and used only for the purpose of contacting participants during the course of the treatment programme. It is imperative to ensure that individual's personal data is protected. A protocol for this has been set up to

ensure the security of the data on the web-portal which will be used at Linköping University in Sweden. During data analysis, data will be anonymised as unique reference codes will be used. Linköping University has conducted similar CBT trials for a range of conditions and is recognised as a center of excellence in Disability research. They have sophisticated methods of developing web-based treatment protocol and measures to protect personal data within this protocol. Personal information will also be destroyed after 12 months of the completion of the study.

Another risk is that participants may become emotionally distressed having to face their tinnitus while undergoing the intervention. The intervention is specifically aimed to reduce the distress associated with tinnitus, so by undertaking the intervention we hope to reduce the distress associated with tinnitus. Participants will be able to contact the researcher by email at any stage should this be required. If any participants become distressed during the intervention, they will be guided by the research team. As there is a Clinical Psychologist on the research team he will be able to advise on the best course of action, depending on the level of distress shown. If there are issues outside the scope of this research, participants will be asked to make an appointment with their general practitioner and a letter explaining what has happened will be sent to the participant and the general practitioner.

The risk of participants running into difficulties during the intervention is also present. They will be able to contact the researcher who will assist in problem-solving these difficulties.

Participants in the iCBT experimental group will be monitored by the therapist evaluating their worksheets and communications via a secure online messaging system. This therapeutic alliance will allow for feedback and assistance if participants have any difficulties. Participants in the face-to-face group will be monitored by the Audiologist they see.



## **STATISTICAL CONSIDERATIONS**

Data analysis will be in accordance with Consolidated Standards of Reporting Trials (CONSORT) guidelines for non-inferiority randomised clinical trials. SPSS V.23.0 will be used, and the data analyst will be blinded to the groups to minimise bias. Results at post-treatment will be based on a per-protocol analysis and compared with an intention-to-treat paradigm, in which incomplete data sets will be analysed using multiple imputations offered by SPSS.

## **DATABASE MANAGEMENT PLANS**

Data will be kept on the secure web portal. Data exported for statistical analysis will be kept for 1 year following the end of the study at <http://www.data-archive.ac.uk/> and then destroyed following this.

## **TRAINING**

Undertaking good clinical practice training prior to research involvement is advisable at <https://www.crn.nihr.ac.uk/learning-development/good-clinical-practice/>. The principle investigator will meet regularly with clinical sites prior to the study starting to ensure the protocol is understood and the research can be undertaken.
